# Supplementary material for: Change of opioid prescribing before and after the COVID pandemic in California, 2017-2022
Source: Research Square preprint supplement (doi:10.21203/rs.3.rs-5456704/v1), 2024-11-21
Supplement: Supplementary file 1 [file f3408e5ae7696c22441f69a4.docx]

Supplementary Table 1 Results of time series interrupted analysis for outcomes measures.

| Attributes | Estimate | Std. Error | Statistic | P-value |
| --- | --- | --- | --- | --- |
| **Multiple Prescriber Episodes**  Intercept | 1.101e+01 | 1.583e-03 | 6950.8 | *<* 2*e −* 16 |
| Baseline trend (β1) before COVID-19 | -2.341e-02 | 8.764e-05 | -267.1 | *<* 2*e −* 16 |
| Level change (β2) after COVID-19 | 9.350e-02 | 2.680e-03 | 34.9 | *<* 2*e −* 16 |
| The change in the trend (β3) after COVID-19 | 3.667e-02 | 1.290e-04 | 284.4 | *<* 2*e −* 16 |
| **High Dosage Opioids**  Intercept | 1.080e+01 | 1.736e-03 | 6223.080 | *<* 2*e −* 16 |
| Baseline trend (β1) before COVID-19 | -2.140e-02 | 9.519e-05 | -224.825 | *<* 2*e −* 16 |
| Level change (β2) after COVID-19 | -1.621e-02 | 3.137e-03 | -5.166 | *<* 2*e −* 16 |
| The change in the trend (β3) after COVID-19 | 1.214e-02 | 1.606e-04 | 75.600 | *<* 2*e −* 16 |
| **Overlapping Opioid and Benzodiazepine**  Intercept | 1.211e+01 | 8.927e-04 | 13571.28 | *<* 2*e −* 16 |
| Baseline trend (β1) before COVID-19 | -1.899e-02 | 4.839e-05 | -392.40 | *<* 2*e −* 16 |
| Level change (β2) after COVID-19 | 1.018e-01 | 1.486e-03 | 68.55 | *<* 2*e −* 16 |
| The change in the trend (β3) after COVID-19 | 1.866e-02 | 7.425e-05 | 251.30 | *<* 2*e −* 16 |
| **Overlapping Opioids**  Intercept | 1.214e+01 | 8.599e-04 | 14119.24 | *<* 2*e −* 16 |
| Baseline trend (β1) before COVID-19 | -1.343e-02 | 4.544e-05 | -295.52 | *<* 2*e −* 16 |
| Level change (β2) after COVID-19 | 4.295e-02 | 1.335e-03 | 32.18 | *<* 2*e −* 16 |
| The change in the trend (β3) after COVID-19 | 2.381e-02 | 6.578e-05 | 362.00 | *<* 2*e −* 16 |
